# Supplementary material
Source: PubMed Central journal article supplement (PMC3509540)
Supplement: NIHMS417875-supplement-Appendix.pdf [file NIHMS417875-supplement-Appendix.pdf]

Supplementary Materials

**High Dimensional ODEs Coupled with  
Mixed-Effects Modeling Techniques for  
Dynamic Gene Regulatory Network  
Identification**

Table S1: Notations and parameter definitions in the five-step CSIEF procedure.

| Step | Parameter                 | Definition                                                                               |
|------|---------------------------|------------------------------------------------------------------------------------------|
| I    | $n$                       | total number of genes                                                                    |
|      | $w_k$                     | proportion of cluster $k$                                                                |
|      | $\mu_k(\cdot)$            | mean curve of cluster $k$                                                                |
|      | $\mathbf{T}_i$            | vector of measurement times for gene $i$                                                 |
|      | $\mathbf{b}_i$            | random effect of gene $i$                                                                |
|      | $\boldsymbol{\epsilon}_i$ | measurement error of each gene in a cluster                                              |
| II   | $n$                       | total number of genes                                                                    |
|      | $t_{ij}$                  | design time points                                                                       |
|      | $g_{ki}(t_{ij})$          | gene expression level at $t_{ij}$ for gene $i$ f the $k$ th module                       |
|      | $M_k(t)$                  | mean expression curve for the $k$ th module                                              |
|      | $M'_k(t)$                 | first order derivative of $M_k(t)$                                                       |
|      | $V_{ki}(t)$               | random-effects functions for gene $i$ in module $k$                                      |
| III  | $y_k(t)$                  | equivalent to $M'_k(t)$                                                                  |
|      | $x_j(t)$                  | equivalent to $M_k(t)$                                                                   |
|      | $\beta_{kj}$              | coefficients of gene $j$ within module $k$                                               |
|      | $\varepsilon_k(t)$        | substitution error of module $k$                                                         |
|      | $\lambda$                 | regularization parameter for SCAD penalty                                                |
| IV   | $x_{ki}$                  | gene expression level for the $i$ th gene in the $k$ th module                           |
|      | $n_k$                     | number of genes in the $k$ th module                                                     |
|      | $M_{[kj]}(t)$             | mean expression levels of the modules that have significant effects on the $k$ th module |
|      | $m_k$                     | number of modules that have significant effects on the $k$ th module                     |
|      | $g_{ki}(t)$               | expression measurement of gene $i$ at time $t$ in module $k$                             |
|      | $\boldsymbol{\beta}_k$    | population parameters for the $k$ th module                                              |
|      | $\boldsymbol{\beta}_{ki}$ | individual parameters for gene $i$ of the $k$ th module                                  |
|      | $\varepsilon_{ki}(t)$     | measurement error in the longitudinal measurement model                                  |
|      | $\mathbf{b}_{ki}$         | random effects of mixed-effects ODE model                                                |
| V    | $T$                       | population size                                                                          |
|      | $S$                       | number of genes that share the same function in the population                           |
|      | $n_k$                     | number of genes clustered in the $k$ th module                                           |
|      | $z$                       | number of genes that share the same function in the module                               |

Table S2: Parameter estimates of 41 ODEs for the module-based network from the yeast cell cycle data in Section 3.

| Module | Influence Module(Parameter Estimates)                                 | Module | Influence Module(Parameter Estimates)                               |
|--------|-----------------------------------------------------------------------|--------|---------------------------------------------------------------------|
| 1      | 9(-0.017), 15(-0.021), 18(-0.063), 30(-0.032)                         | 22     | 14(-0.01), 18(0.109), 20(-0.622), 32(-0.158), 41(-0.065)            |
| 2      | 8(-0.019), 25(-0.042), 30(-0.052), 32(0.069), 41(0.028)               | 23     | 25(-0.186), 30(-0.117), 38(0.014), 41(-0.065)                       |
| 3      | 7(0.048), 9(-0.012), 14(-0.063), 18(-0.005), 25(0.015)                | 24     | 8(0.098), 9(0.087), 14(0.017), 25(-0.031), 32(0.024), 41(-0.085)    |
| 4      | 9(0.024), 14(0.017), 32(0.015), 39(0.019), 41(-0.157)                 | 25     | 9(-0.086), 20(-0.35), 32(0.04), 41(0.049)                           |
| 5      | 8(1.45), 9(0.184), 14(0.212), 18(-1.47), 32(0.395), 41(0.525)         | 26     | 8(0.016), 9(-0.014), 14(-0.004), 30(-0.022), 32(0.019), 41(0.03)    |
| 6      | 18(-0.045), 25(0.003), 30(0.037), 32(-0.055), 41(-0.047)              | 27     | 8(0.014), 9(-0.05), 15(0.16), 25(-0.033), 41(0.132)                 |
| 7      | 18(0.109), 25(-0.146), 30(-0.078), 32(0.159), 41(0.007)               | 28     | 8(0.036), 9(-0.02), 32(0.024), 38(0.02), 41(-0.075)                 |
| 8      | 18(-0.328), 32(0.007), 41(-0.31)                                      | 29     | 14(0.067), 15(0.086), 18(-0.269), 30(0.19), 32(0.04)                |
| 9      | 14(0.204), 18(-0.484), 20(1.41), 32(-0.09), 41(0.46)                  | 30     | 14(0.052), 32(-0.38), 38(-0.089)                                    |
| 10     | 9(0.039), 14(0.019), 18(0.052), 25(-0.063), 32(0.056), 41(0.044)      | 31     | 9(0.136), 14(0.031), 15(-0.089), 18(-0.05), 30(-0.034), 41(0.038)   |
| 11     | 9(0.055), 14(0.003), 18(-0.055), 41(-0.148)                           | 32     | 8(0.086), 9(-0.029), 14(0.249), 18(0.109), 30(0.79)                 |
| 12     | 14(-0.063), 15(0.025), 41(-0.086)                                     | 33     | 14(-0.023), 15(0.015), 18(0.085), 30(-0.031), 32(-0.083), 41(0.093) |
| 13     | 9(-0.031), 14(-0.012), 25(0.047), 32(0.005), 41(-0.026)               | 34     | 9(-0.03), 15(0.062), 18(-0.167), 32(0.136), 38(0.026)               |
| 14     | 14(-0.139), 15(0.066), 25(-0.072), 30(-0.128), 38(0.0154), 41(-0.044) | 35     | 9(0.253), 14(0.121), 15(-0.12), 18(0.054), 30(0.012), 41(0.038)     |
| 15     | 14(0.021), 15(-0.227), 30(0.22), 32(-0.263), 41(0.115)                | 36     | 14(-0.013), 20(-0.027), 30(-0.11), 32(0.09), 38(0.024)              |
| 16     | 14(0.002), 30(-0.143), 32(-0.053), 38(-0.023), 41(0.024)              | 37     | 9(-0.028), 14(-0.051), 15(-0.016), 18(0.15), 30(-0.162), 41(0.027)  |
| 17     | 14(-0.029), 15(0.008), 25(-0.019), 30(-0.043), 41(-0.013)             | 38     | 14(0.276), 15(-0.293), 25(0.262), 30(0.747), 41(0.103)              |
| 18     | 8(0.326), 9(0.015), 38(0.013), 41(-0.518)                             | 39     | 8(0.708), 14(0.086), 18(-0.448), 30(-0.074), 38(0.194)              |
| 19     | 8(0.082), 9(0.066), 14(0.031), 25(-0.102), 32(0.03), 41(-0.017)       | 40     | 8(-0.057), 9(-0.111), 14(-0.033), 25(-0.071), 32(-0.024), 41(-0.01) |
| 20     | 9(-0.152), 18(-0.167), 25(0.262), 41(-0.071)                          | 41     | 9(0.109), 14(0.041), 18(0.635), 25(-0.192), 41(-0.225)              |
| 21     | 9(0.047), 14(-0.026), 18(-0.193), 25(0.052), 34(0.422), 41(-0.237)    |        |                                                                     |

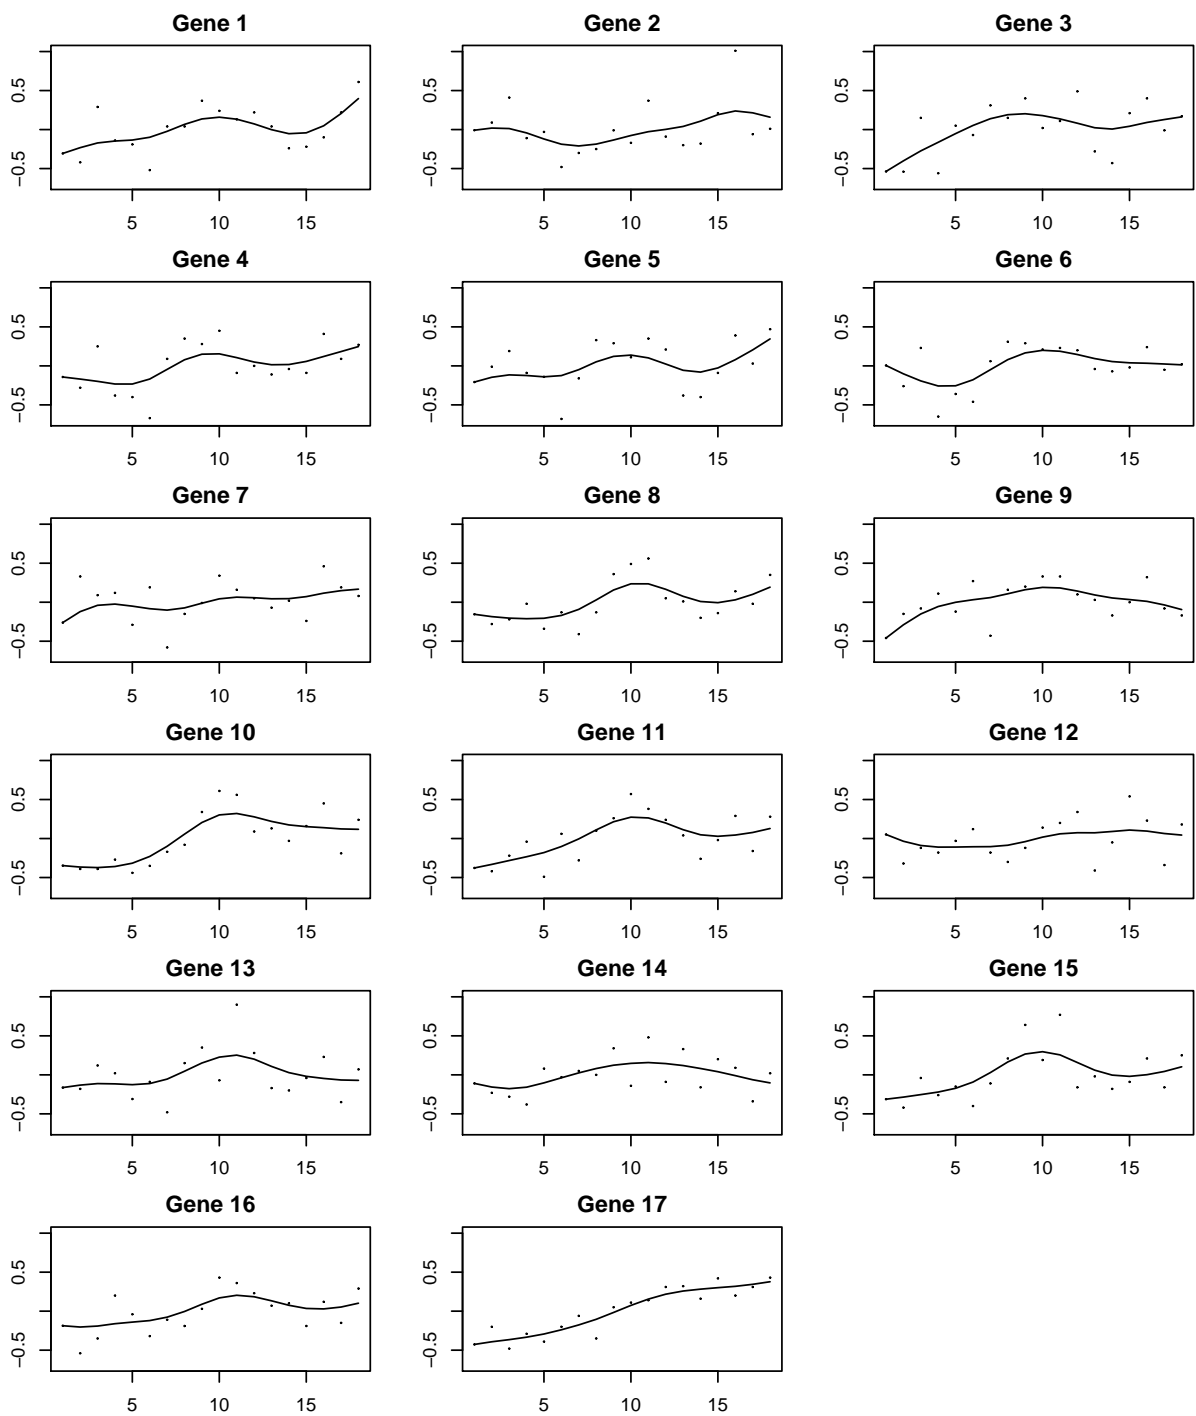

**Figure S1.** Illustration of individual gene fitting based on model (2.11): fitted curves (solid lines) of 17 genes from Module 1 overlaid with gene expression data (dots).
